# Supplementary material for: The Spectrum of Mitochondrial Ultrastructural Defects in Mitochondrial Myopathy
Source: Springer Nature journal article supplement (doi:10.1038/srep30610), 2016-08-10
Supplement: 41598_2016_BFsrep30610_MOESM1_ESM.pdf [file 41598_2016_BFsrep30610_MOESM1_ESM.pdf]

## **SUPPLEMENTARY INFORMATION**

### **The Spectrum of Mitochondrial Ultrastructural Defects in Mitochondrial Myopathy**

Amy E Vincent, Yi Shiau Ng, Kathryn White, Tracey Davey, Carmen Mannella, Gavin Falkous,  
Catherine Feeney, Andrew M Schaefer, Robert McFarland, Grainne S Gorman,  
Robert W Taylor, Douglass M Turnbull, Martin Picard

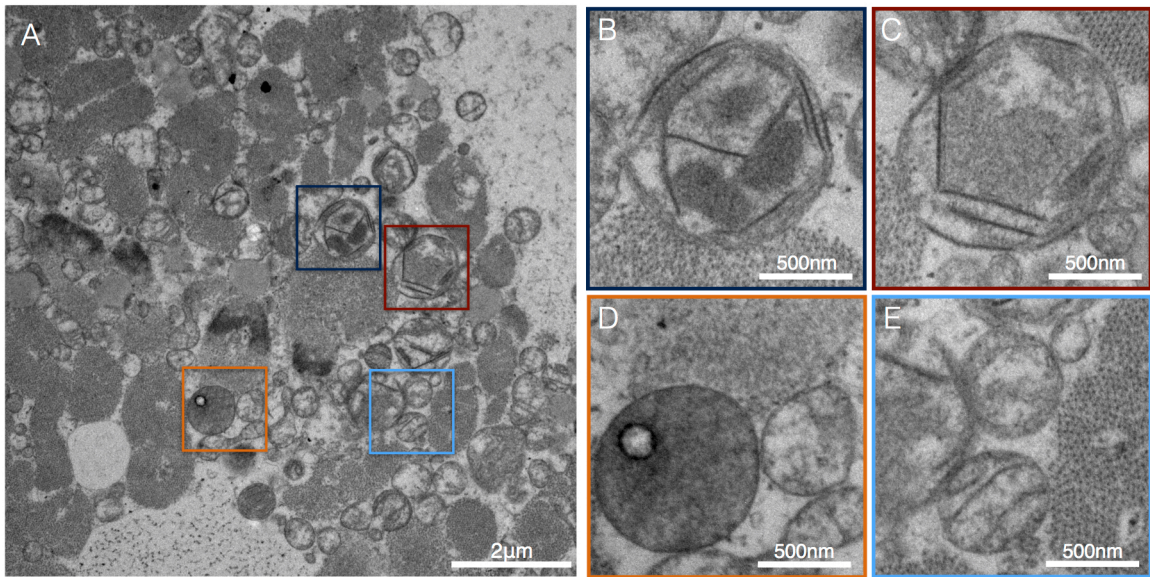

**Figure S1. Mitochondrial morphology and ultrastructure is heterogeneous within muscle fibers. (A)** Low magnification electron micrograph of muscle fiber region containing mitochondria exhibiting different ultrastructural defects in patient 4 (m. 8344A>G). **(B-E)** Higher magnification images of selected areas in (A) showing heterogeneity in mitochondrial sizes, electron density, inclusion types, and cristae appearance and organization.

**Supplementary Table 1:** Results from a systematic review of literature of electron microscopy studies (n = 135) in skeletal muscle of patients with confirmed mitochondrial myopathy.

| Author (Year)                        | Muscle                     | Age*                                     | Clinical                                                                                                                           | Genetics                                                                    | Ultrastructural abnormality                                                                                                                                                                                                                                                                                                                                                                                                                                                                                                                                                                                           |
|--------------------------------------|----------------------------|------------------------------------------|------------------------------------------------------------------------------------------------------------------------------------|-----------------------------------------------------------------------------|-----------------------------------------------------------------------------------------------------------------------------------------------------------------------------------------------------------------------------------------------------------------------------------------------------------------------------------------------------------------------------------------------------------------------------------------------------------------------------------------------------------------------------------------------------------------------------------------------------------------------|
| van Wijngaarden <i>et al.</i> (1967) | Deltoid and gastrocnemius  | 15 years                                 | [Pediatric] Myopathy without muscle atrophy, deltoid muscle weakened, paresis of pelvic muscles (n=1).                             | N.S.                                                                        | Matrix swelling and electron lucent mitochondria; clumped and filamentous, small osmiophilic dense bodies present in mitochondrial matrix; larger electron-dense round granules or irregularly shaped inclusions of moderately electron dense granular material.                                                                                                                                                                                                                                                                                                                                                      |
| Afifi <i>et al.</i> (1972)           | N.S.                       | 19 years                                 | Hypermetabolic “mitochondrial” disease. Substantial muscle weakness (n=1).                                                         | N.S.                                                                        | Osmiophilic inclusions of variable size and density within mitochondria; dense inclusions replacing most of the cristae, with cristae reduced to a thin circular rim at the periphery of affected mitochondria.                                                                                                                                                                                                                                                                                                                                                                                                       |
| Hudgson <i>et al.</i> (1972)         | Peroneus longus and biceps | 35 years (proband) and 12 years (niece). | Familial “mitochondrial” myopathy. Facial and ocular, pectoralis major and bicep weakness, considerable lower limb weakness (n=2). | Dominant inheritance; high penetrance; maternal transmission. Mutation N.S. | Giant mitochondria measuring up to 3 µm containing concentric cristae and small electron-dense inclusions; mitochondria with “parking-lot” type inclusions between inner and outer mitochondrial membranes; mitochondria with six layers with periodicity between both their transverse and axial cristae of approximately 75 Å.                                                                                                                                                                                                                                                                                      |
| Adachi <i>et al.</i> (1973)          | Ocular muscles             | 37 years                                 | CPEO, cerebella ataxia and cardiomyopathy (n=1).                                                                                   | N.S.                                                                        | Enlarged mitochondria with parallel or concentric cristae.                                                                                                                                                                                                                                                                                                                                                                                                                                                                                                                                                            |
|                                      | Deltoid                    | 37 years (same individual as above)      | CPEO, cerebella ataxia and cardiomyopathy (n=1).                                                                                   | N.S.                                                                        | Unusually large mitochondria ranging from 5-8 µm in greatest diameter with cristae usually located at the periphery of the organelle and rectangular inclusions; cross sections of the PCI structures disclosed well-organized arrays of tubules oriented in parallel rows with a diameter of 70-80 Å, with a lumen of 30-40 Å, and interspace between the tubules of 20-30 Å, arranged in a helical pattern; abnormal mitochondria almost completely replaced by dense rectangular inclusions and occasionally showed complete transition to crystalline structures obscuring the original mitochondrial morphology. |
| Shibasaki <i>et al.</i> (1973)       | Deltoid                    | 60 years                                 | Late onset myopathy; marked atrophy of shoulder girdle and proximal upper limb,                                                    | N.S.                                                                        | Elongated, giant mitochondria up to 5 µm in greatest diameter, particularly in the SS region; PCIs including lattice pattern, four-fold array, or amorphous form.                                                                                                                                                                                                                                                                                                                                                                                                                                                     |

|                                  |                                 |                    |                                                                                          |      |                                                                                                                                                                                                                                                         |
|----------------------------------|---------------------------------|--------------------|------------------------------------------------------------------------------------------|------|---------------------------------------------------------------------------------------------------------------------------------------------------------------------------------------------------------------------------------------------------------|
|                                  |                                 |                    | pelvic and proximal lower limb muscles; mild atrophy of distal lower limb muscles (n=1). |      |                                                                                                                                                                                                                                                         |
| Crosby and Chou (1974)           | Left bicep                      | 10 years           | [Pediatric] Leigh disease (n=1).                                                         | N.S. | Enlarged mitochondria (in cross section); whirled cristae membranes; electron dense spheroid bodies; electron-lucent mitochondrial matrix spaces; complex, convoluted membrane systems; PCI within cristae membrane.                                    |
| Black <i>et al.</i> (1975)       | Anterior tibialis or Quadriceps | 30 years           | Mitochondrial disorder, RRFs, and ptosis (n=1).                                          | N.S. | Enlarged mitochondria with “wavy” cristae and central electron dense granular material; round dense osmiophilic inclusions; occasional lipid inclusions and concentric cristae.                                                                         |
| Karpati <i>et al.</i> (1975)     | Quadriceps                      | 11 years           | [Pediatric] KSS biopsied before and after Carnitine supplementation (n=1).               | N.S. | PCI; concentric cristae; swollen mitochondria.                                                                                                                                                                                                          |
| McLeod <i>et al.</i> (1975)      | Quadriceps (vastus lateralis)   | 27 years           | Mitochondrial myopathy (n=1).                                                            | N.S. | PCI with parallel bands of amorphous material surrounded by a membrane; mitochondria with “empty” electron-lucent spaces; amorphous material between the mitochondrial membranes; mitochondria containing “empty space” surrounded by double membranes. |
| Bastiaensen <i>et al.</i> (1979) | Ocular and skeletal             | >30 years [review] | PEO plus.                                                                                | N.S. | [Review] Aggregates of swollen mitochondria with parallel or concentric cristae.                                                                                                                                                                        |
| Linden and Ansink (1979)         | Gastrocnemius                   | 11 years           | [Pediatric] KSS. Ptosis, mental and physical retardation, dysarthria (n=1).              | N.S. | PCI; large mitochondria.                                                                                                                                                                                                                                |
| Fitzsimons and Tyer (1980)       | Left deltoid                    | 10 and 17 years    | Mitochondrial myopathy. Myopathy, scoliosis, respiratory failure. (n=2)                  | N.S. | Rectangular inclusions, PCI, amorphous material and concentric cristae in mitochondria.                                                                                                                                                                 |
| Fukuhara <i>et al.</i> (1980)    | Quadriceps femoris              | 21 years           | MERRF. Myoclonic jerk, seizures, hypotonia, ataxia (n=1).                                | N.S. | Electron-lucent homogenous matrix space; enlarged mitochondria; markedly proliferated IMM; PCIs.                                                                                                                                                        |
| Land <i>et al.</i> (1981)        | Left deltoid                    | 14 years           | [Pediatric] Mitochondrial myopathy, ophthalmoplegia (n=1).                               | N.S. | Mitochondria with “finger-print” like patterns (i.e., densely packed parallel cristae); concentric cristae.                                                                                                                                             |
| Shah <i>et al.</i> (1982)        | Quadriceps                      | N.S.               | KSS, polymyositis,                                                                       | N.S. | PCIs (30-45 nm long and 22-23 nm wide); round or oval swollen                                                                                                                                                                                           |

|                                    |                                                                                     |                         |                                                                                                                       |      |                                                                                                                                                                                                         |
|------------------------------------|-------------------------------------------------------------------------------------|-------------------------|-----------------------------------------------------------------------------------------------------------------------|------|---------------------------------------------------------------------------------------------------------------------------------------------------------------------------------------------------------|
|                                    |                                                                                     |                         | neurogenic atrophy, mitochondrial myopathy.                                                                           |      | mitochondria; presence of various inclusions; densely packed or tubular cristae formation; concentric cristae or “lamellar bodies”; parallel destruction of cristae and presence of amorphous material. |
| Holliday <i>et al.</i> (1983)      | N.S.                                                                                | 18 and 26 years         | Mitochondrial myopathy, encephalopathy (n=2).                                                                         | N.S. | Rectangular or curvilinear PCIs composed of four parallel lamina within a boundary membrane.                                                                                                            |
| Mitsumoto <i>et al.</i> (1983)     | Deltoid                                                                             | 11 to 49 years (m=34.5) | CPEO with RRF (n=8).                                                                                                  | N.S. | Mitochondria with absent cristae; irregular vacuoles; PCIs; concentric cristae; dark inclusion; whirl formation.                                                                                        |
| Muller-Hocker <i>et al.</i> (1983) | N.S.                                                                                | N.S.                    | PEO (n=8).                                                                                                            | N.S. | Enlarged mitochondria with high cristae content; concentric cristae and PCIs.                                                                                                                           |
| Prick <i>et al.</i> (1983)         | N.S.                                                                                | 2 and 5 years           | [Pediatric] Alper’s disease (n=2).                                                                                    | N.S. | Aggregates of enlarged mitochondria with PCIs in SS region.                                                                                                                                             |
| Sarnat <i>et al.</i> (1983)        | Quadriceps femoris, deltoid, extensor digitorum longus of the forearm (post mortem) | 3 weeks and 4 months    | [Pediatric] Mitochondrial myopathy, cerebro-hepato renal (Zellweger) syndrome (n=2).                                  | N.S. | Electron dense granules in mitochondrial matrix; myelin figures, degeneration and other degenerative changes (e.g. membrane rupture) to mitochondria.                                                   |
| Sengers <i>et al.</i> (1983)       | Quadriceps                                                                          | 4 years                 | [Pediatric] Mitochondrial myopathy, carnitine deficiency (n=1).                                                       | N.S. | Large mitochondria with densely packed or whirled cristae; granular or fibrillary electron dense material in intercrystal space.                                                                        |
| Hayes <i>et al.</i> (1984)         | Intercostal muscle                                                                  | 20 years                | Mitochondrial myopathy, bilateral ptosis, muscle bulk normal, mild diffuse weakness (n=1).                            | N.S. | SS mitochondria with concentric cristae and inclusions; central droplets of neutral or osmiophilic lipid or areas of central necrosis.                                                                  |
| Kennaway <i>et al.</i> (1984)      | N.S.                                                                                | 17 years                | Mitochondrial myopathy, lactic acidosis (n=1).                                                                        | N.S. | Abnormally large mitochondria some with PCIs.                                                                                                                                                           |
| Bresolin <i>et al.</i> (1985)      | Quadriceps                                                                          | 2, 3, 6 and 7 months    | [Pediatric] Mitochondrial myopathy, hypertonia and severe limb weakness, tendon and pharyngeal weakness absent (n=1). | N.S. | Large mitochondria with irregular or concentric tubular cristae.                                                                                                                                        |
| Muller-Hocker <i>et al.</i> (1985) | N.S.                                                                                | 12 years                | [Pediatric] Mitochondrial myopathy, exercise                                                                          | N.S. | Swollen mitochondria with PCIs.                                                                                                                                                                         |

|                                      |                               |          |                                                                                                                                                         |      |                                                                                                                                                                              |
|--------------------------------------|-------------------------------|----------|---------------------------------------------------------------------------------------------------------------------------------------------------------|------|------------------------------------------------------------------------------------------------------------------------------------------------------------------------------|
|                                      |                               |          | induced muscle weakness and pain, tachycardia and dyspnoea (n=1).                                                                                       |      |                                                                                                                                                                              |
| Niebrój-Doblosz <i>et al.</i> (1985) | Biceps brachii and quadriceps | 7 years  | [Pediatric] KSS. Biceps and quadriceps weakness, mental retardation, progressive limb weakness (n=1).                                                   | N.S. | Giant mitochondria; PCIs; concentric cristae.                                                                                                                                |
| Fischer <i>et al.</i> (1986)         | Quadriceps                    | 17 years | Mitochondrial encephalomyopathy, seizures, myoclonic contractures, retarded motor and speech development (n=1).                                         | N.S. | Small mitochondria with swollen matrix; concentric cristae or “concentric laminated bodies”.                                                                                 |
| Lehmann <i>et al.</i> (1986)         | Deltoid                       | 44 years | Myopathy with rimmed vacuoles, mild shoulder girdle weakness, exercise intolerance (n=1).                                                               | N.S. | PCIs of Type I and II.                                                                                                                                                       |
| Stadholders and Sengers (1987)       | N.S.                          | N.S.     | Mitochondrial myopathy (KSS, MELAS, MERRF)                                                                                                              | N.S. | [Review] PCIs and concentric cristae; suggests model of PCI formation; classify 2 types of PCI (Type I, Type II); suggests different types of PCI for different fibre types. |
| Van Ekeren <i>et al.</i> (1987)      | N.S.                          | 6 days   | Hereditary mitochondrial hypertrophic cardiomyopathy (n=1).                                                                                             | N.S. | Mitochondria with vesicular inclusions; matrix crystals.                                                                                                                     |
| Columbo <i>et al.</i> (1988)         | Left quadriceps               | 27 years | Mitochondrial occuloskeletal myopathy (n=1).                                                                                                            | N.S. | PCIs; globular dense bodies; cristae running concentrically.                                                                                                                 |
| Dias-Tosta (1988)                    | N.S.                          | N.S.     | CPEO. Sporadic muscle weakness (n=10), familial isolated myopathy (n=9), myopathy with retinopathy, cerebellar ataxia, or peripheral neuropathy (n=15). | N.S. | PCIs; concentric cristae; “parking lot” and “intramural type” inclusions.                                                                                                    |
| Federico <i>et al.</i>               | Quadriceps                    | N.S.     | LHON (n=3).                                                                                                                                             | N.S. | Enlarged mitochondria with PCIs.                                                                                                                                             |

|                               |                             |                               |                                                                                                                                                  |      |                                                                                                         |
|-------------------------------|-----------------------------|-------------------------------|--------------------------------------------------------------------------------------------------------------------------------------------------|------|---------------------------------------------------------------------------------------------------------|
| (1988)                        |                             |                               |                                                                                                                                                  |      |                                                                                                         |
| Mizusawa <i>et al.</i> (1988) | Rectus femoris or tibialis  | 46 and 48 years               | Familial mitochondrial myopathy, optic atrophy, muscle wasting, weakness (n=2).                                                                  | N.S. | Aggregates of mitochondria with PCIs; electron dense globular bodies; concentric cristae.               |
| Kim <i>et al.</i> (1989)      | Left deltoid                | 53 years                      | CPEO. Mild proximal limb weakness (n=1)                                                                                                          | N.S. | PCIs; irregularly orientated cristae.                                                                   |
| Paulus <i>et al.</i> (1989)   | Left quadriceps             | 33 years                      | Mitochondrial encephalomyopathy with perivacuolar inclusions, bilateral hearing loss, seizures, cerebral atrophy, moderate muscle atrophy (n=1). | N.S. | Small osmiophilic rod-like inclusions; piles within round or oval vacuoles (perivacuolar inclusions).   |
| Rivner <i>et al.</i> (1989)   | N.S                         | 25 years                      | KSS. Cerebellar and cortical atrophy, mild ataxia and generalised weakness of proximal and distal muscles (n=1).                                 | N.S. | Deformed internal architecture; PCI arrays; concentric cristae or "cristae arranged circumferentially". |
| Suzuki <i>et al.</i> (1989)   | Quadriceps                  | 35 years                      | Mitochondrial encephalomyopathy, general muscle atrophy, psychiatric disturbance (n=1).                                                          | N.S. | Enlarged mitochondria with PCIs.                                                                        |
| Arruda <i>et al.</i> (1990)   | Quadriceps                  | 32 and 34 years               | Mitochondrial myopathy with myoclonic epilepsy. Myoclonic jerks and seizures (n=2).                                                              | N.S. | Enlarged mitochondria.                                                                                  |
| Haginoya <i>et al.</i> (1990) | Quadriceps (vastus femoris) | 8-43 years (m=25)             | MERRF and MELAS. Mixed, myoclonic seizure, ataxia, stroke-like episodes, ptosis (n=3).                                                           | N.S. | Aggregated mitochondria in areas of segmental COX deficiency.                                           |
| Korenke <i>et al.</i> (1990)  | N.S.                        | 2 weeks - 9 years (m=2 years) | [Pediatric] Mitochondrial myopathy. Mixture; respiratory insufficiency, hypotonia, motor                                                         | N.S. | Abnormally small and large mitochondria; PCIs; polymorphy; altered cristae.                             |

|                                      |                               |                                 |                                                                                           |                                                   |                                                                                                                                                                                                                             |
|--------------------------------------|-------------------------------|---------------------------------|-------------------------------------------------------------------------------------------|---------------------------------------------------|-----------------------------------------------------------------------------------------------------------------------------------------------------------------------------------------------------------------------------|
|                                      |                               |                                 | retardation and feeding problems (n=8).                                                   |                                                   |                                                                                                                                                                                                                             |
| Schapira <i>et al.</i> (1990)        | Quadriceps (vastus lateralis) | 14 years                        | Mitochondrial myopathy. Weakness of limbs and trunk, high CK.                             | Defect in protein transport? Molecular cause N.S. | Disordered “labyrinth” cristae with electron dense and granular inclusions.                                                                                                                                                 |
| Sumegi <i>et al.</i> (1990)          | N.S.                          | 45 days                         | [Pediatric] COX deficiency.                                                               | N.S.                                              | Swollen mitochondria, and often “tennis-racket” like mitochondria (swollen at one end); mitochondria with honeycomb cristae.                                                                                                |
| Takeda <i>et al.</i> (1990)          | Extraocular muscles           | 14 to 30 years (m=20)           | MELAS and MERRF. Mixed symptoms (n=3).                                                    | N.S.                                              | Mitochondria of irregular shape with tubule-vesicular cristae; morphological changes more prominent in MELAS than MERRF. No PCI.                                                                                            |
| Kim <i>et al.</i> (1991)             | N.S.                          | 16 and 22 years                 | Mitochondrial myopathy. Severe respiratory dysfunction, mild myopathy.                    | N.S.                                              | Sickle shaped mitochondria containing curvilinear PCI, regular PCIs.                                                                                                                                                        |
| McKelvie <i>et al.</i> (1991)        | Quadriceps (vastus lateralis) | 48 years (n=1)                  | KSS. Ophthalmoplegia, limb weakness, ataxia (n=1).                                        | 3.5Kb single mtDNA deletion <sup>i</sup>          | PCIs in subsarcolemmal aggregates of mitochondria.                                                                                                                                                                          |
| Letellier <i>et al.</i> (1992)       | Deltoid                       | 1 week to 4 months (m=2 months) | [Pediatric] Mitochondrial myopathy. Mixture of symptoms (n=6).                            | N.S.                                              | Enlarged and swollen mitochondria.                                                                                                                                                                                          |
| Linda <i>et al.</i> (1992)           | N.S.                          | N.S.                            | Mitochondrial myopathy. MELAS (n=3), Marinesco-Sjogren syndrome (n=7) and KSS (n=2).      | mtDNA mutations N.S.                              | PCIs; pleoconial mitochondria; enlarged “megamitochondria”; thickening, unfolding, and parallelization of cristae; concentric cristae or “concentric lamellar cristae”; augmented matrix space; amorphous inclusion bodies. |
| Modi <i>et al.</i> (1992)            | Biceps brachii                | 20 years                        | Mitochondrial myopathy. Proximal myopathy, cardiomyopathy, bilateral deafness and ptosis. | N.S.                                              | Laminated PCIs.                                                                                                                                                                                                             |
| Telerman-Toppet <i>et al.</i> (1992) | N.S.                          | 8 weeks                         | [Pediatric] COX deficiency and mtDNA depletion (n=1).                                     | N.S.                                              | PCIs; abnormal spatial arrangement of mitochondrial cristae.                                                                                                                                                                |
| Angelini <i>et al.</i>               | Biceps and                    | 19 and 25                       | Hypertrophic                                                                              | Dystrophin                                        | Enlarged mitochondria with irregular cristae.                                                                                                                                                                               |



|                                  |                                                  |                             |                                                                                                                                                           |                                                           |                                                                                                                                               |
|----------------------------------|--------------------------------------------------|-----------------------------|-----------------------------------------------------------------------------------------------------------------------------------------------------------|-----------------------------------------------------------|-----------------------------------------------------------------------------------------------------------------------------------------------|
| (1993)                           | quadriceps                                       | years                       | cardiomyopathy with mitochondrial myopathy. Weakness in upper limb girdle muscles and Gower's signs and waddling gait, no cerebellar abnormalities (n=2). | and mtDNA deletions ruled out. Cause N.S. <sup>i</sup>    |                                                                                                                                               |
| Coquet <i>et al.</i> (1993)      | N.S.                                             | 15 and 17 years             | MERRF. Myoclonic jerks, epileptic seizures, ataxia, deafness, lower limb weakness (n=2).                                                                  | <i>m.8344A&gt;G<sup>a</sup></i><br>tRNA <sup>Lys</sup>    | PCIs; concentric cristae.                                                                                                                     |
| Reichmann <i>et al.</i> (1993)   | Biceps brachii                                   | 53 years                    | KSS. Mild generalized muscle weakness and exercise intolerance, diabetes, slowly progressive ataxia (n=1).                                                | Multiple deletions <sup>b</sup> (causative mutation N.S.) | PCIs; concentric cristae.                                                                                                                     |
| Ionasescu <i>et al.</i> (1994)   | Quadriceps (vastus lateralis)                    | 9 years                     | [Pediatric] MERRF. Progressive proximal weakness (n=1).                                                                                                   | <i>m.15990A&gt;G<sup>a</sup></i><br>tRNA <sup>Pro</sup>   | PCIs.                                                                                                                                         |
| Norby <i>et al.</i> (1994)       | Quadriceps (vastus medialis)                     | 15 years                    | [Pediatric] KSS. Epileptic seizures, ataxia, myopathy (n=1).                                                                                              | 11Kb single mtDNA deletion <sup>b</sup>                   | Enlarged mitochondria with PCIs.                                                                                                              |
| Stadhouders <i>et al.</i> (1994) | N.S.                                             | N.S.                        | CPEO, KKS, MELAS                                                                                                                                          | N.S.                                                      | PCIs (Types I and II).                                                                                                                        |
| Gilbert and Ems (1996)           | N.S.                                             | 21 months                   | Pearson's syndrome. Pancreatic atrophy, enlarged kidneys, metabolic acidosis, high blood lactate and hypomagnesemia (n=1).                                | N.S.                                                      | Aggregated SS and IMF mitochondria; concentric cristae, enlarged mitochondria with disrupted membranes; central follicular (granular) matrix. |
| Melberg <i>et al.</i> (1996)     | Quadriceps (vastus lateralis) or bicularis oculi | 16 to 63 years (m=52 years) | Dominant PEO. Ocular myopathy, hypogonadism (n=14).                                                                                                       | Dominant genetic cause N.S.                               | Densely packed cristae; size variation; longitudinally or circular cristae; crystalloid-like alterations.                                     |

|                                        |                                            |                             |                                                                                                                           |                                                                                                                                          |                                                                      |
|----------------------------------------|--------------------------------------------|-----------------------------|---------------------------------------------------------------------------------------------------------------------------|------------------------------------------------------------------------------------------------------------------------------------------|----------------------------------------------------------------------|
| Toscano <i>et al.</i> (1996)           | N.S.                                       | 73 to 75 years (m=74 years) | Late-onset mitochondrial neuropathy. Muscle weakness and cramps, ataxia, exercise intolerance (n=3).                      | No mtDNA mutations found <sup>b,c</sup> . Genetic cause N.S.                                                                             | PCIs, enlarged or bizarrely shaped mitochondria.                     |
| van Domburg <i>et al.</i> (1996)       | Soleus, quadriceps, ocular rectus superior | 25 to 36 years (m=30 years) | CPEO plus. Ocular myopathy, encephalomyopathy, sensory neuropathy, ataxia, polyneuropathy (n=6).                          | No evidence of maternal inheritance, common point mutations and deletions ruled out <sup>i</sup> . Genetic cause N.S.                    | PCIs, mitochondria with deranged cristae; concentric cristae.        |
| Wada <i>et al.</i> (1996)              | Quadriceps femoris                         | 11 weeks                    | [Pediatric] Mitochondrial myopathy. Muscular hypotonia, profound acidosis, difficulty suckling, no muscle weakness (n=1). | N.S.                                                                                                                                     | Enlarged mitochondria with sparse cristae; concentric cristae.       |
| Heimann-Patterson <i>et al.</i> (1997) | N.S.                                       | 4 to 63 years (m=28 years)  | Family with mitochondrial myopathy. Exercise intolerance, proximal lower limb weakness in first decade of life (n=11).    | mtDNA deletions and common point mutations ruled out, a number of non-pathogenic point mutations found <sup>d</sup> . Genetic cause N.S. | Uneven and electron dense cristae; globular inclusions.              |
| Kim and Chi (1997)                     | Deltoid                                    | 22 and 23 years             | KSS. Neck and proximal limb weakness, severe ptosis, AV block.                                                            | Single mtDNA deletion <sup>1,c</sup>                                                                                                     | PCIs, enlarged mitochondria with distorted cristae.                  |
| Smith <i>et al.</i> (1997)             | Quadriceps                                 | N.S.                        | Mother of MELAS patient, with insulin dependent                                                                           | <i>m.3243A&gt;G<sup>a</sup></i><br>tRNA <sup>Leu</sup>                                                                                   | Pleomorphic mitochondria; concentric cristae; electron-dense bodies. |

|                                  |                              |                                |                                                                                                                                                                                                                             |                                                                                        |                                                                                       |
|----------------------------------|------------------------------|--------------------------------|-----------------------------------------------------------------------------------------------------------------------------------------------------------------------------------------------------------------------------|----------------------------------------------------------------------------------------|---------------------------------------------------------------------------------------|
|                                  |                              |                                | diabetes (n=1).                                                                                                                                                                                                             |                                                                                        |                                                                                       |
| Takahashi <i>et al.</i> (1998)   | Quadriceps femoris           | 9 months                       | [Pediatric] Leigh disease. Generalized hypotonia at birth, apnea attacks, irregular breathing, poor head control (n=1).                                                                                                     | <i>m.8993T&gt;G<sup>a</sup></i><br>MT-ATP6                                             | Variably sized mitochondria; aberrant cristae.                                        |
| Castro-Gago <i>et al.</i> (1999) | Deltoid                      | Fetus                          | Hydranencephalic-hydrocephalic syndrome in association with mitochondrial encephalomyopathy.                                                                                                                                | Common mtDNA point mutations and deletions ruled out <sup>†</sup> . Genetic cause N.S. | Enlarged SS mitochondria; abnormal cristae (honey-comb-like).                         |
| Kyriacou <i>et al.</i> (1999)    | N.S.                         | 6 days to 10 years (m=2 years) | [Pediatric] Mitochondrial encephalomyopathy. Hypotonia and psychomotor retardation (n=5), multisystemic (n=2), Pearson syndrome (n=1), Leigh disease (n=1).<br>(Adult) Myalgia and proximal limb weakness (n=8), PEO (n=3). | N.S.                                                                                   | Pleomorphic mitochondria; simplified cristae; vesicular cristae.                      |
| Melegh <i>et al.</i> (1999)      | N.S.                         | 5 months                       | Mitochondrial encephalomyopathy. Myoclonic jerk, uncoordinated eye movement (n=1).                                                                                                                                          | Multiple mtDNA deletions <sup>b</sup> . Nuclear mutation N.S.                          | Enlarged mitochondria with no or few cristae.                                         |
| Carta <i>et al.</i> (2000)       | Quadriceps (rectus medialis) | 48 years                       | CPEO (n=1)                                                                                                                                                                                                                  | Single common mtDNA deletion <sup>1,b</sup>                                            | PCIs; “onion-like” concentric cristae, “ghost-like” mitochondria (devoid of cristae). |
| Makino <i>et al.</i> (2000)      | N.S.                         | N.S.                           | Leigh syndrome. Hypotonia, necrotic lesions in basal ganglia and brainstem (n=1).                                                                                                                                           | <i>m.8993T&gt;G<sup>a</sup></i><br>MT-ATP6                                             | Enlarged mitochondria.                                                                |

|                                   |                |                                 |                                                                                                                              |                                                                                                                          |                                                                            |
|-----------------------------------|----------------|---------------------------------|------------------------------------------------------------------------------------------------------------------------------|--------------------------------------------------------------------------------------------------------------------------|----------------------------------------------------------------------------|
| Wang <i>et al.</i> (2000)         | N.S.           | 9 years                         | No prominent muscle weakness or hypotonia, but wobbling gait early on. Proximal limb myopathy 1 month prior to biopsy (n=1). | N.S.                                                                                                                     | Loss of matrix and cristae.                                                |
| De Kremer <i>et al.</i> (2001)    | N.S.           | N.S.                            | [Pediatric] Barth-syndrome like disorder, marked muscle weakness.                                                            | <i>m.3243A&gt;G<sup>d</sup></i><br>tRNA <sup>Leu</sup>                                                                   | Round swollen mitochondria; fine fibrillary matrix; poorly define cristae. |
| Higashikata <i>et al.</i> (2001)  | Biceps brachii | 80 years                        | MELAS. Cardiomyopathy.                                                                                                       | <i>m.3243A&gt;G<sup>a</sup></i><br>tRNA <sup>Leu</sup>                                                                   | Aggregates of enlarged mitochondria with PCIs.                             |
| Rollins <i>et al.</i> (2001)      | N.S.           | 1 to 70 years<br>(m=12.5 years) | Mitochondrial cytopathy (n=113)                                                                                              | Mutation of “maternal inheritance”<br>N.S.                                                                               | PCI; enlarged mitochondria.                                                |
| Vogel (2001)                      | N.S.           | N.S.                            | Mitochondrial myopathy                                                                                                       | N.S.                                                                                                                     | [Review] Swollen, elongated, devoid of cristae, PCIs.                      |
| Fagiolari <i>et al.</i> (2002)    | N.S.           | 27 to 73 years<br>(m=55 years)  | CPEO (n=7), PEO and ptosis (n=7), myopathy (n=1).                                                                            | Multiple mtDNA deletions <sup>b</sup> due to <i>ANT1</i> mutation – <i>p.114A&gt;P</i> and <i>p.98L&gt;P<sup>i</sup></i> | Mitochondrial proliferation and PCIs.                                      |
| Fillano <i>et al.</i> (2002)      | N.S.           | 2 to 12 years<br>(m=7 years)    | HEADD syndrome (hypotonia, epilepsy, autism, and developmental delay) (n=3)                                                  | Multiple mtDNA deletions <sup>c</sup> (nuclear cause N.S.) or 7.4Kb single mtDNA deletion <sup>c</sup>                   | Stacked cristae; electron dense deposits.                                  |
| Kim <i>et al.</i> (2002)          | Biceps brachii | 18 Years                        | MERRF. Myoclonic epilepsy, myopathy, ataxia, dysarthria (n=1).                                                               | <i>m.8344A&gt;G<sup>e</sup></i><br>tRNA <sup>Leu</sup>                                                                   | PCI; concentric cristae.                                                   |
| Marín-García <i>et al.</i> (2002) | N.S.           | 15 years                        | PEO (n=1)                                                                                                                    | Multiple mtDNA                                                                                                           | Vacuolated cristae; variation in size and morphology.                      |

|                                 |                              |                                                                           |                                                                                                                  | deletions <sup>b</sup>                                   |                                                                                                                                                             |
|---------------------------------|------------------------------|---------------------------------------------------------------------------|------------------------------------------------------------------------------------------------------------------|----------------------------------------------------------|-------------------------------------------------------------------------------------------------------------------------------------------------------------|
| Nevo <i>et al.</i> (2002)       | Quadriceps                   | 11 to 26 months (m=16 months)                                             | [Pediatric] Mitochondrial myopathy. Motor deterioration, dyspneic, muscle weakness, bilateral ptosis.            | <i>TK2</i> mutation causing mtDNA depletion <sup>i</sup> | Pleomorphic mitochondria; enlarged mitochondria; concentric cristae or “concentric lamellae”.                                                               |
| Kyriakides <i>et al.</i> (2003) | N.S.                         | 6 days to 18 months (m=6 months, n=19), 19 to 75 years (m=42 years, n=14) | Mitochondrial encephalomyopathies: myopathic, multisystemic or CPEO. Pediatric (n=19) and adult (n=14).          | N.S.                                                     | Mitochondrial dysmorphology more common in children than adults and vice versa.                                                                             |
| Uusimaa <i>et al.</i> (2003)    | N.S.                         | 10 months                                                                 | Alpers-Huttenlocher-like disease (n=1)                                                                           | <i>m.7706G&gt;A<sup>d</sup></i><br>MT-COII               | Enlarged mitochondria; variable shape and size.                                                                                                             |
| Mierau <i>et al.</i> (2004)     | Quadriceps                   | 8 years                                                                   | [Pediatric] Lactic acidosis, proximal weakness, cognitive delay.                                                 | N.S.                                                     | PCIs; enlarged or abnormally small; concentric cristae; parking lot type inclusions; spherical electron dense inclusions.                                   |
| Patterson <i>et al.</i> (2004)  | N.S.                         | 16 years                                                                  | KSS.                                                                                                             | 5Kb mtDNA deletion <sup>f</sup>                          | PCIs.                                                                                                                                                       |
| Carta <i>et al.</i> (2005)      | Quadriceps (rectus medialis) | 42 to 75 years (m=63 years)                                               | CPEO and LHON (n=3)                                                                                              | Single common mtDNA deletion <sup>1,i</sup>              | “Ghost” mitochondrial profiles (lack of cristae) with partial to complete matrix emptying rearrangement of the cristae with an “onion ring-like” appearance |
| Coulbault <i>et al.</i> (2005)  | N.S.                         | 10 months                                                                 | [Pediatric] Psychomotor retardation, failure to thrive, hypotonia, hepatocellular dysfunction, thrombocytopenia. | <i>m.5693T&gt;C<sup>e</sup></i> ,<br>tRNA <sup>ASN</sup> | PCIs; stacked cristae.                                                                                                                                      |

|                                 |                                                    |                                                                                      |                                                                                                                                      |                                                                                                                               |                                                                                                                                                                                                                                                               |
|---------------------------------|----------------------------------------------------|--------------------------------------------------------------------------------------|--------------------------------------------------------------------------------------------------------------------------------------|-------------------------------------------------------------------------------------------------------------------------------|---------------------------------------------------------------------------------------------------------------------------------------------------------------------------------------------------------------------------------------------------------------|
|                                 |                                                    |                                                                                      | Multiple organ failure (lethal) (n=1).                                                                                               |                                                                                                                               |                                                                                                                                                                                                                                                               |
| Dinopoulos <i>et al.</i> (2005) | Quadriceps                                         | 1 to 15 months (n=9 months)                                                          | [Pediatric] Hypotonia, myoclonic epilepsy, cardiomyopathy, psychomotor regression, failure to thrive, lactic acidosis (mixed) (n=4). | <i>NDUFS2</i> c.237T>C, <i>NDUFS8</i> c.236C>T and c.302G>A, <i>NDUFVI</i> c.175C>X and c.1268C>T mutations (CI) <sup>i</sup> | Concentric cristae or “concentric laminated bodies”; osmiophilic mitochondria.                                                                                                                                                                                |
| Enns <i>et al.</i> (2005)       | Quadriceps (vastus lateralis) and deltoid          | 6 weeks to 5 years (m=1.5 years)                                                     | Electron transport chain abnormalities, RRFs. (n=7)                                                                                  | N.S.                                                                                                                          | Enlarged mitochondria; swelling with electron-lucent matrix space; proliferation of mitochondria; elongated and branched.                                                                                                                                     |
| Güçer <i>et al.</i> (2005)      | N.S.                                               | 4 months and 9 years                                                                 | [Pediatric] Seizures, ptosis, failure to thrive, high serum lactate and pyruvate, RRF (n=2).                                         | Single common mtDNA deletion <sup>1,b</sup>                                                                                   | Increased matrix density and cristae; SS mitochondrial accumulation.                                                                                                                                                                                          |
| Karppa <i>et al.</i> (2005)     | Quadriceps (vastus lateralis) or tibialis anterior | 16 to 70 years (m=45 years)                                                          | MELAS                                                                                                                                | <i>m.3243A&gt;G</i> <sup>i</sup> tRNA <sup>Leu</sup>                                                                          | PCIs (Types I and II); variation in size and ultrastructure.                                                                                                                                                                                                  |
| Kyriacou <i>et al.</i> (2005)   | N.S.                                               | 6 days to 18 years (median=4 years, n=31) and 19 to 75 years (median=46 years, n=17) | Mitochondrial encephalomyopathy (n=48).                                                                                              | N.S.                                                                                                                          | Elongated and enlarged mitochondria more common in children than adults; subsarcolemmal aggregation of mitochondrial (RRF) more common in adults.                                                                                                             |
| Pulkes <i>et al.</i> (2005)     | N.S.                                               | 16 and 23 years                                                                      | MERRF. Proximal upper and lower limb weakness, ataxia, seizures and myoclonus (n=2).                                                 | <i>m.7472_insC</i> <sup>i</sup> tRNA <sup>Ser</sup>                                                                           | Type 2 fibres larger and dense matrix components and contain either or both type 1 or 2 crystalline intra-membranous inclusions. Type 1 myofiber mitochondria, have many large and abnormal forms, show a more orderly arrangement of their cristae, a lesser |

|                                |                               |                                         |                                                                                                                                              |                                                                                                                                   |                                                                                                                                |
|--------------------------------|-------------------------------|-----------------------------------------|----------------------------------------------------------------------------------------------------------------------------------------------|-----------------------------------------------------------------------------------------------------------------------------------|--------------------------------------------------------------------------------------------------------------------------------|
|                                |                               |                                         |                                                                                                                                              |                                                                                                                                   | quantity of less dense matrix, and only type 1 intra-membranous crystalline inclusions.                                        |
| Stenqvist <i>et al.</i> (2005) | Quadriceps (vastus lateralis) | 10 years                                | [Pediatric] MELAS. Mild central and cortical brain atrophy, encephalopathy, no mention of myopathy (n=1).                                    | <i>m.3271T&gt;C<sup>f</sup></i><br>tRNA <sup>Leu</sup>                                                                            | Dense granular inclusions, parallel cristae arrays, open matrix spaces.                                                        |
| Zeharia <i>et al.</i> (2005)   | N.S.                          | 19 years                                | Mitochondrial myopathy (n=1).                                                                                                                | Autosomal recessive<br><i>PUS1<sup>d</sup></i>                                                                                    | PCIs.                                                                                                                          |
| Cardaioli <i>et al.</i> (2006) | Quadriceps                    | 31 years                                | Deafness, mental retardation, brain atrophy (n=1).                                                                                           | <i>m.7472insC<sup>e</sup></i><br>tRNA <sup>ser (UCN)</sup><br>and<br><i>m.7472A&gt;C<sup>e</sup></i><br>tRNA <sup>ser (UCN)</sup> | Swollen mitochondria with reduced cristae and PCIs.                                                                            |
| Deschauer <i>et al.</i> (2006) | N.S.                          | 66 years                                | Exercise intolerance, walking difficulty, muscle cramps, hearing impairment, mild myopathy and peripheral neuropathy (n=1).                  | <i>m.622G&gt;A<sup>d</sup></i><br>tRNA <sup>Phe</sup>                                                                             | Enlarged mitochondria with PCIs.                                                                                               |
| Miles <i>et al.</i> (2006)     | N.S.                          | 2 weeks to 21 years (median= 2.7 years) | KSS (n=4), Leigh syndrome (n=2), lethal infantile COX deficiency (n=2), MERRF (n=1), encephalopathy with (n=72) and without myopathy (n=46). | N.S.                                                                                                                              | PCIs; abnormal patterns of cristae; concentric cristae or “circular cristae” and fingerprint cristae; abnormal matrix density. |
| Saneto and Boulding (2006)     | N.S.                          | 11 years                                | [Pediatric] Muscle weakness, hypercarbia, lactic acidosis, absent deep tendon reflexes, respiratory difficulty (n=1).                        | <i>m.3243A&gt;G<sup>i</sup></i><br>tRNA <sup>Leu</sup>                                                                            | Enlarged rounded mitochondria; distorted cristae; electron dense inclusions.                                                   |
| Thajeb <i>et al.</i> (2006)    | N.S.                          | 65 years                                | Oculopharyngeal somatic myopathy, bilateral ptosis and difficulty swallowing                                                                 | Single mtDNA deletion <sup>c,d</sup> and homoplasmic<br><i>m.5814T&gt;C<sup>d</sup></i>                                           | “Parking lot” type PCIs.                                                                                                       |

|                                |                                                       |                                    |                                                                                                                                                             |                                                          |                                                                                                                                                                                                             |
|--------------------------------|-------------------------------------------------------|------------------------------------|-------------------------------------------------------------------------------------------------------------------------------------------------------------|----------------------------------------------------------|-------------------------------------------------------------------------------------------------------------------------------------------------------------------------------------------------------------|
|                                |                                                       |                                    | (n=1).                                                                                                                                                      | tRNA <sup>Cys</sup>                                      |                                                                                                                                                                                                             |
| Wabbels <i>et al.</i> (2007)   | M. levator palpebrae, and/or the M. orbicularis oculi | 4 to 81 years (m=40 years)         | Adult/child Ptosis/CPEO (n=21).                                                                                                                             | N.S.                                                     | PCIs; concentric and wavy cristae; pleomorphy; intermitochondrial granules.                                                                                                                                 |
| Perry <i>et al.</i> (2008)     | Quadriceps                                            | 3 days                             | [Pediatric] Sengers syndrome. Bilateral ptosis, hypotonia, trace reflexes, skeletal muscle myopathy and cardiomyopathy (n=1).                               | N.S.                                                     | Diffuse dysmorphic mitochondria.                                                                                                                                                                            |
| Pronicki <i>et al.</i> (2008)  | Quadriceps (vastus lateralis)                         | 9 months to 12 years (m=3.5 years) | [Pediatric] Leigh Syndrome. Motor regression, bulbar symptoms, difficulty walking, hypotonia, failure to thrive, floppiness, disturbed eye movement (n=21). | <i>SURF1</i> <sup>i</sup> mutation                       | Enlarged or elongated mitochondria; dark matrix with densely packed, concentric lamellae cristae; mitochondrial matrix displaced by amorphous granular material; small electron-dense osmiophilic granules. |
| Yerdelen <i>et al.</i> (2008)  | Biceps brachii                                        | 38 years                           | KSS. Delayed motor and mental development, arrhythmia (n=1).                                                                                                | N.S.                                                     | PCIs; swollen mitochondria with few electron dense cristae; osmiophilic and electron-dense structures.                                                                                                      |
| Abu-Amero <i>et al.</i> (2009) | N.S.                                                  | 34 years                           | MELAS (n=1)                                                                                                                                                 | No mtDNA mutations or POLG mutations. Genetic cause N.S. | Mitochondria with parallel cristae and PCIs, osmiophilic inclusions and mitochondrial vacuoles.                                                                                                             |
| DeBrosse <i>et al.</i> (2009)  | Deltoid                                               | 67 years                           | CPEO. Ptosis, mild upper limb weakness, mild memory difficulty and imbalance (n=1).                                                                         | N.S.                                                     | PCIs; dystrophic mitochondria.                                                                                                                                                                              |
| Yau <i>et al.</i> (2009)       | Quadriceps                                            | 14 years                           | [Pediatric] KSS, short stature, mental deficiency, lower limb                                                                                               | Single 7.2Kb mtDNA deletion <sup>c</sup>                 | PCIs; irregular structure and cristae; central core-like fibres (IMF mitochondrial depletion).                                                                                                              |



|                             |                 |                                              |                                                                                           |                                                                                                                                                        |                                                                                                                     |
|-----------------------------|-----------------|----------------------------------------------|-------------------------------------------------------------------------------------------|--------------------------------------------------------------------------------------------------------------------------------------------------------|---------------------------------------------------------------------------------------------------------------------|
|                             |                 |                                              | weakness, mild ataxic gait (n=1).                                                         |                                                                                                                                                        |                                                                                                                     |
| Ali <i>et al.</i> (2010)    | Triceps brachii | 62 years                                     | CPEO. Diplopia, no muscle weakness (n=1).                                                 | Single mtDNA deletion <sup>1,b,c,d</sup>                                                                                                               | PCIs (Type I); swollen rounded mitochondria.                                                                        |
| Ascaso <i>et al.</i> (2010) | N.S.            | 48 years                                     | KSS. Bilateral ptosis, proximal muscle weakness and RRFs (n=1).                           | Single mtDNA deletion <sup>1b,c,d</sup>                                                                                                                | Large atypical mitochondria; round electron dense bodies.                                                           |
| Cardenas and Amato (2010)   | N.S.            | 14 years                                     | [Pediatric] Alpers disease. Neuropathological degeneration of cerebral grey matter (n=1). | <i>POLG</i> mutations (compound heterozygous) <i>c.911T&gt;G</i> (p.L304R), <i>c.1174C&gt;G</i> (p.L392V) and a duplication (pR1081dup) <sup>f</sup>   | Reduced mitochondrial content, absence of cristae, vacuolization.                                                   |
| Chi <i>et al.</i> (2010)    | Quadriceps      | 1 month to 15 years (median=15 months, n=69) | [Pediatric] Leigh disease (n=6).                                                          | <i>m.8993T&gt;G</i> (n=3) MT-ATP6, <i>m.8993T&gt;C</i> MT-ATP6 (n=1), <i>m.10191T&gt;C</i> MT-ND3 (n=1) and <i>m.8344A&gt;G</i> (n=1) <sup>c,d,e</sup> | Tubular cristae; swollen mitochondrial accumulation; variable shapes; concentric “whirl” cristae; inclusion bodies. |
|                             |                 |                                              | [Pediatric] MELAS (n=4).                                                                  | <i>m.3243A&gt;G</i> tRNA <sup>Leu</sup> (n=4) <sup>c,d,e</sup>                                                                                         |                                                                                                                     |
|                             |                 |                                              | [Pediatric] Pearson syndrome (n=1)                                                        | 6 Kb mtDNA deletion (n=1) <sup>c,d,e</sup>                                                                                                             |                                                                                                                     |

|                                    |                             |                             |                                                                                                                   |                                                                                                              |                                                                                                                                                                            |
|------------------------------------|-----------------------------|-----------------------------|-------------------------------------------------------------------------------------------------------------------|--------------------------------------------------------------------------------------------------------------|----------------------------------------------------------------------------------------------------------------------------------------------------------------------------|
|                                    |                             |                             | Mixed mitochondrial disease (n=58)                                                                                | Genetic cause N.S.                                                                                           |                                                                                                                                                                            |
| Han <i>et al.</i> (2010)           | Rectus femoris              | 4 to 48 years (m=N.S)       | Spinocerebellar ataxia type 7. Unsteady gait, visual problems, cerebellum and brain stem atrophy (n=34).          | SCA7 mutation <sup>c</sup> CAG repeat                                                                        | Mitochondrial with tubular or absent cristae.                                                                                                                              |
| Herrero-Marti <i>et al.</i> (2010) | N.S.                        | 50 years                    | MELAS MERRF overlap (n=1)                                                                                         | <i>m.5521G&gt;A<sup>g</sup></i> tRNA <sup>Trp</sup>                                                          | PCIs.                                                                                                                                                                      |
| Lang <i>et al.</i> (2010)          | Ocular medial rectus        | 47 and 67 years             | CPEO, ptosis, exercise intolerance and mild myopathy (n=2).                                                       | Multiple mtDNA deletions <sup>i</sup> (nuclear mutation not defined)                                         | Enlarged mitochondria; hypertrophic concentric lamellar cristae.                                                                                                           |
| Baskin <i>et al.</i> (2011)        | N.S.                        | 9 years                     | Mitochondrial myopathy. Myopathic findings by electromyography, deafness, ocular and neurological findings (n=1). | <i>NPHS3<sup>g</sup></i> mutation                                                                            | Abnormal mitochondrial shape and cristae patterns.                                                                                                                         |
| Cenacchi <i>et al.</i> (2011)      | Quadriceps, Tricep, deltoid | 19 to 79 years (m=56 years) | Mitochondrial myopathy (=14).                                                                                     | N.S.                                                                                                         | Accumulation of SS mitochondria; rounded, elongated, or cup-shaped mitochondria; abnormally large or “mega-mitochondria”; concentric cristae; lipid-dense; PCIs in matrix. |
| Conway <i>et al.</i> (2011)        | gastrocnemius               | 29 years                    | MELAS. Seizures, hearing loss (n=1).                                                                              | <i>m.3243A&gt;G<sup>i</sup></i> tRNA <sup>Leu</sup>                                                          | Abnormally arranged cristae and aberrant electron density.                                                                                                                 |
| Shaaf <i>et al.</i> (2011)         | N.S.                        | 3 and 8 years               | Optic nerve atrophy, hypotonic, ataxia (n=2).                                                                     | <i>OPA1</i> mutation <i>c.2708_2711d</i> eITTAG (p.V903GfsX3) and <i>c.1146A&gt;G</i> (p.I382M) <sup>d</sup> | Mitochondrial with dense osmiophilic bodies.                                                                                                                               |

|                              |                   |                             |                                                                                                                                  |                                                                                                          |                                                                                                                                                                                                                                                |
|------------------------------|-------------------|-----------------------------|----------------------------------------------------------------------------------------------------------------------------------|----------------------------------------------------------------------------------------------------------|------------------------------------------------------------------------------------------------------------------------------------------------------------------------------------------------------------------------------------------------|
| Blakey <i>et al.</i> (2012)  | Quadriceps        | 21 years                    | Neuropathy and leukoencephalopathy, walking difficulties, distal numbness, muscle wasting of hands and distal lower limbs (n=1). | <i>MPV17</i> mutation <sup>d</sup> causing 12.5Kb mtDNA deletion <sup>c</sup>                            | Enlarged, “parking lot” type inclusions.                                                                                                                                                                                                       |
| Bostan <i>et al.</i> (2012)  | Deltoid           | 52 years                    | Ptosis, ataxia, neuropathy, gastroparesis, myopathy (n=1).                                                                       | <i>POLG</i> mutation <sup>i</sup>                                                                        | PCIs.                                                                                                                                                                                                                                          |
| Gotz <i>et al.</i> (2012)    | N.S.              | 5 days                      | [Pediatric] Fatal neonatal lactic acidosis (n=1).                                                                                | <i>m.7453G&gt;A<sup>d</sup></i> tRNA <sup>Ser</sup>                                                      | Enlarged and swollen mitochondria, concentric cristae.                                                                                                                                                                                         |
| Kendall <i>et al.</i> (2012) | Multiple          | N.S.                        | Multiple mitochondrial disorders.                                                                                                | N.S.                                                                                                     | [Review] Previous reports suggest electron microscopy is not a good diagnostic tool. However other sources report the frequency of 30-44% of aberrant mitochondrial morphology in pediatric mitochondrial disease and conclude its usefulness. |
| Pfeffer <i>et al.</i> (2012) | Levator palpebrae | 34 to 72 years (m=52 years) | CPEO (n=8)                                                                                                                       | <i>POLG1</i> (n=1), single mtDNA deletion (n=4), multiple mtDNA deletion (n=1, NS (n=2) <sup>b,c,e</sup> | Large mitochondrial aggregates, pleomorphism, various inclusions.                                                                                                                                                                              |
| Roefs <i>et al.</i> (2012)   | Orbicularis       | 46 to 64 years (m=58 years) | Progressive bilateral ptosis and generalised muscle weakness (n=3).                                                              | Single mtDNA deletion <sup>b,c</sup>                                                                     | Enlarged mitochondria; densely packed parallel cristae; electron dense inclusions.                                                                                                                                                             |
| Baric <i>et al.</i> (2013)   | Deltoid           | 17 years                    | Elevated CK, mild myopathy in brachial muscles.                                                                                  | <i>m.5522G&gt;A<sup>c,g</sup></i> tRNA <sup>Trp</sup>                                                    | Swollen globular looking mitochondria, occasional branching and angular OMM.                                                                                                                                                                   |
| Lopez <i>et al.</i> (2013)   | Tibialis anterior | 22 years                    | [Pediatric] Fatal infantile mitochondrial DNA depletion (n=1).                                                                   | <i>TK2</i> mutation <sup>c,g</sup>                                                                       | Elongated mitochondria with PCIs.                                                                                                                                                                                                              |
| Lu and Huang (2013)          | Biceps brachii    | 1 to 13 years (m=8)         | MELAS (n=6)                                                                                                                      | <i>m.3243A&gt;G<sup>i</sup></i> tRNA <sup>Leu</sup>                                                      | Globular looking mitochondrial shape elongated with swollen regions and PCIs.                                                                                                                                                                  |

|                                  |                | years)          |                                                                                                                   |                                                                       |                                                                                                                         |
|----------------------------------|----------------|-----------------|-------------------------------------------------------------------------------------------------------------------|-----------------------------------------------------------------------|-------------------------------------------------------------------------------------------------------------------------|
| Nolte <i>et al.</i> (2013)       | N.S.           | 16 and 17 years | Seizures, myoclonic jerk, PEO (n=2).                                                                              | <i>POLG1</i> c.2243G>C (p.W748S) and c.1879C>T (p.R627W) <sup>g</sup> | Elongated mitochondria with “globoid” inclusions (amorphous lipid-like); SS mitochondrial accumulation or “aggregates”. |
| Polimeno <i>et al.</i> (2013)    | N.S.           | N.S.            | Mitochondrial myopathy (other symptoms N.S.).                                                                     | N.S.                                                                  | PCIs; mitochondria assuming bizarre and/or giant forms.                                                                 |
| Siriwardena <i>et al.</i> (2013) | N.S.           | 15 months       | Sengers syndrome (n=1)                                                                                            | AGK mutation <sup>g</sup>                                             | Pentagonal mitochondrial crystals with a dense outer layer.                                                             |
| Yuan <i>et al.</i> (2013)        | N.S.           | 51 and 54 years | RRF, rimmed vacuoles, muscle weakness in facial, cervical and proximal muscles, wasting of shoulder girdle (n=2). | m.8344A>G <sup>d</sup> tRNA <sup>Lys</sup>                            | PCIs; Mitochondrial proliferation, concentric cristae.                                                                  |
| Zhao <i>et al.</i> (2013)        | Biceps brachii | 66 years        | CPEO, RRF and diffuse muscle weakness (n=1) <sup>g</sup> .                                                        | Large 4Kb mtDNA mutation                                              | PCIs.                                                                                                                   |
| Chen <i>et al.</i> (2014)        | N.S.           | 44 years        | CPEO, ptosis, diplopia, bulbar paresis, inflammatory myopathy, neck muscle weakness (n=1).                        | Single mtDNA deletion <sup>1,h</sup>                                  | PCIs preferentially in SS mitochondria.                                                                                 |
| Hopmann <i>et al.</i> (2014)     | N.S.           | 72 years        | Mitochondrial myopathy, muscle atrophy and proximal weakness of arms trunk and legs (n=1).                        | Multiple mtDNA deletions <sup>b,c</sup>                               | “Parking lot” inclusions; swollen aggregated mitochondria; loss of cristae.                                             |
| Chatfield <i>et al.</i> (2015)   | N.S.           | 2 months        | Mild encephalomyopathy, diffusion of the perirolandic white matter (n=1).                                         | <i>HSD10</i> mutation <sup>g</sup> c.740A>G (p.N247S)                 | Loss of cristae; swollen vacuolated mitochondria.                                                                       |
| Nozuma <i>et al.</i> (2015)      | N.S.           | 32 and 76 years | Mitochondrial myopathy, limb weakness and                                                                         | 16 non-pathogenic                                                     | Accumulation of mitochondria, vacuolated mitochondria.                                                                  |

|  |  |  |                                          |                                          |  |
|--|--|--|------------------------------------------|------------------------------------------|--|
|  |  |  | general fatigue, high CK, myalgia (n=2). | mtDNA alterations:<br>Pathogenic<br>N.S. |  |
|--|--|--|------------------------------------------|------------------------------------------|--|

\*Age at biopsy for EM study

AV: Atrioventricular

CPEO: Chronic progressive external ophthalmoplegia

IMF: Intermyoibrillar

KSS: Kearns-sayer syndrome

MELAS: Mitochondrial encephalomyopathy, lactic acidosis and stoke-like episodes

mtDNA: Mitochondrial DNA

MERRF: Myoclonic epilepsy and ragged red fibres

N.S.: Not specified

PCI: Paracrystalline inclusion

PEO: progressive external ophthalmoplegia

RRF: Ragged-red fibers

SS: Subsarcolemmal

<sup>1</sup>: common large-scale deletion, 4977bp in length between two 13-bp direct repeats at positions *m.13447-13459* and *m.8470-8482*.

Genetic diagnostic methodology: <sup>a</sup>Restriction site mutation assay; <sup>b</sup>Southern blot, <sup>c</sup>PCR, <sup>d</sup>Sanger sequencing, <sup>e</sup>RFLP, <sup>f</sup>Solid phase mini sequencing,

<sup>g</sup>Sequencing, <sup>h</sup>Next generation sequencing, <sup>i</sup>Not specified

## References

- Abu-Amero, K., H. Al-Dhalaan, S. Bohlega, A. Hellani, and R. Taylor. 2009. A patient with typical clinical features of mitochondrial encephalopathy, lactic acidosis and stroke-like episodes (MELAS) but without an obvious genetic cause: A case report. *Journal of Medical Case Reports*. 3 (no pagination).
- Adachi, M., J. Torii, B.W. Volk, P. Briet, A. Wolintz, and L. Schneck. 1973. Electron microscopic and enzyme histochemical studies of cerebellum, ocular and skeletal muscles in chronic progressive ophthalmoplegia with cerebellar ataxia. *Acta Neuropathologica*. 23:300-312.
- Afifi, A.K., M.Z.M. Ibrahim, R.A. Bergman, N.A. Haydar, J. Mire, N. Bahuth, and F. Kaylani. 1972. Morphologic features of hypermetabolic mitochondrial disease. A light microscopic, histochemical and electron microscopic study. *Journal of the Neurological Sciences*. 15:271-290.
- Ali, N., C.E. Woodward, M. Sweeney, R. Phadke, J.L. Holton, J. Acheson, G.T. Plant, and F.D. Bremner. 2010. Pupillary dysfunction in an atypical case of mitochondrial myopathy with tubular aggregates. *Journal of neuro-ophthalmology : the official journal of the North American Neuro-Ophthalmology Society*. 30:153-156.
- Angelini, C., P. Melacini, M.L. Valente, H. Reichmann, R. Carrozzo, M. Fanin, L. Vergani, G.M. Boffa, A. Martinuzzi, and G. Fasoli. 1993. Hypertrophic cardiomyopathy with mitochondrial myopathy - A new phenotype of complex II defect. *Japanese Heart Journal*. 34:63-77.
- Arruda, W.O., L.F. Torres, A. Lombes, S. DiMauro, B.A. Cardoso, H.A. Teive, D. De Paola, and R.R. Seixas. 1990. Mitochondrial myopathy and myoclonic epilepsy. *Arquivos de neuro-psiquiatria*. 48:32-43.
- Ascaso, F.J., E. Lopez-Gallardo, E. Del Prado, E. Ruiz-Pesini, and J. Montoya. 2010. Macular lesion resembling adult-onset vitelliform macular dystrophy in Kearns-Sayre syndrome with multiple mtDNA deletions. *Clinical and Experimental Ophthalmology*. 38:812-816.
- Baric, I., K. Fumic, D. Petkovic Ramadza, W. Sperl, F.A. Zimmermann, D. Muacevic-Katanec, Z. Mitrovic, L. Pazanin, L. Cvitanovic Sojat, T. Kekez, Z. Reiner, and J.A. Mayr. 2013. Mitochondrial myopathy associated with a novel 5522G>A mutation in the mitochondrial tRNA(Trp) gene. *European journal of human genetics : EJHG*. 21:871-875.
- Baskin, E., U. Selda Bayrakci, F. Alehan, H. Ozdemir, A. Oner, R. Horvath, V. Vega-Warner, F. Hildebrandt, and F. Ozaltin. 2011. Respiratory-chain deficiency presenting as diffuse mesangial sclerosis with NPHS3 mutation. *Pediatric nephrology (Berlin, Germany)*. 26:1157-1161.
- Bastiaensen, L.A.K., H.H.J. Jaspar, and A.M. Stadhouders. 1979. Ophthalmoplegia-plus. *Documenta Ophthalmologica*. 46:365-380.
- Black, J.T., D. Judge, L. Demers, and S. Gordon. 1975. Ragged-red fibers. A biochemical and morphological study. *Journal of the Neurological Sciences*. 26:479-488.
- Blakely, E.L., A. Butterworth, R.D. Hadden, I. Bodi, L. He, R. McFarland, and R.W. Taylor. 2012. MPV17 mutation causes neuropathy and leukoencephalopathy with multiple mtDNA deletions in muscle. *Neuromuscular disorders : NMD*. 22:587-591.
- Bostan, A., G. Glibert, B. Dachy, and B. Dan. 2012. Novel mutation in spacer region of POLG associated with ataxia neuropathy spectrum and gastroparesis. *Autonomic Neuroscience: Basic and Clinical*. 170:70-72.

- Bresolin, N., M. Zeviani, E. Bonilla, R.H. Miller, R.W. Leech, S. Shanske, M. Nakagawa, and S. DiMauro. 1985. Fatal infantile cytochrome c oxidase deficiency: decrease of immunologically detectable enzyme in muscle. *Neurology*. 35:802-812.
- Cardaioli, E., P.D. Pozzo, A. Cerase, F. Sicurelli, A. Malandrini, N.D. Stefano, M.L. Stromillo, C. Battisti, M.T. Dotti, and A. Federico. 2006. Rapidly progressive neurodegeneration in a case with the 7472insC mutation and the A7472C polymorphism in the mtDNA tRNAser(UCN) gene. *Neuromuscular Disorders*. 16:26-31.
- Cardenas, J.F., and R.S. Amato. 2010. Compound heterozygous polymerase gamma gene mutation in a patient with alpers disease. *Seminars in Pediatric Neurology*. 17:62-64.
- Carta, A., V. Carelli, T. D'Adda, F.N. Ross-Cisneros, and A.A. Sadun. 2005. Human extraocular muscles in mitochondrial diseases: comparing chronic progressive external ophthalmoplegia with Leber's hereditary optic neuropathy. *The British journal of ophthalmology*. 89:825-827.
- Carta, A., T. D'Adda, F. Carrara, and M. Zeviani. 2000. Ultrastructural analysis of extraocular muscle in chronic progressive external ophthalmoplegia. *Archives of ophthalmology (Chicago, Ill. : 1960)*. 118:1441-1445.
- Castro-Gago, M., A. Alonso, E. Pintos-Martínez, A. Beiras-Iglesias, Y. Campos, J. Arenas, M.I. Novo-Rodríguez, and J. Eirís-Puñal. 1999. Congenital hydranencephalic-hydrocephalic syndrome associated with mitochondrial dysfunction. *Journal of Child Neurology*. 14:131-135.
- Cenacchi, G., P. Valentina, F. Marina, P. Elena, and A. Corrado. 2011. Comparison of muscle ultrastructure in myasthenia gravis with anti-MuSK and anti-AChR antibodies. *Journal of Neurology*. 258:746-752.
- Chatfield, K.C., C.R. Coughlin, M.W. Friederich, R.C. Gallagher, J.R. Hesselberth, M.A. Lovell, R. Ofman, M.A. Swanson, J.A. Thomas, R.J.A. Wanders, E.P. Wartchow, and J.L.K. Van Hove. 2015. Mitochondrial energy failure in HSD10 disease is due to defective mtDNA transcript processing. *Mitochondrion*. 21:1-10.
- Chen, T., C. Pu, Q. Shi, Q. Wang, L. Cong, J. Liu, H. Luo, L. Fei, W. Tang, and S. Yu. 2014. Chronic progressive external ophthalmoplegia with inflammatory myopathy. *International journal of clinical and experimental pathology*. 7:8887-8892.
- Chi, C.S., H.F. Lee, C.R. Tsai, H.J. Lee, and L.H. Chen. 2010. Clinical manifestations in children with mitochondrial diseases. *Pediatric neurology*. 43:183-189.
- Colombo, A., E. Merelli, P. Sola, P. Panzetti, D. Quaglino Jr, and C. Fornieri. 1988. Mitochondrial ocular skeletal myopathy: case report. *The Italian Journal of Neurological Sciences*. 9:385-389.
- Conway, L.J., T.E. Robertson, J.J. McGill, and J.P. Hanson. 2011. MELAS syndrome in an Indigenous Australian woman. *Medical Journal of Australia*. 195:581-582.
- Coquet, M., F. Degoul, A. Vital, M. Malgat, J.P. Mazat, C. Louvet-Giendaj, D. Fontan, F. Tison, M. Diry, and C. Marsac. 1993. Merrif family with 8344 mutation in tRNA (lys). Evidence of a mitochondrial vasculopathy in muscle biopsies. *Neuromuscular disorders : NMD*. 3:593-597.
- Coulbault, L., D. Herlicoviez, F. Chapon, M.H. Read, M.J. Penniello, P. Reynier, G. Fayet, A. Lombès, P. Jauzac, and S. Allouche. 2005. A novel mutation in the mitochondrial tRNAAsn gene associated with a lethal disease. *Biochemical and Biophysical Research Communications*. 329:1152-1154.

- Crosby, T.W., and S.M. Chou. 1974. "Ragged-red" fibers in Leigh's disease. *Neurology*. 24:49-54.
- De Kremer, R.D., A. Paschini-Capra, S. Bacman, C. Argarana, G. Civallero, R.I. Kelley, N. Guelbert, A. Latini, I. Noher de Halac, A. Giner-Ayala, J. Johnston, R. Proujansky, I. Gonzalez, C. Depetris-Boldini, A. Oller-Ramirez, C. Angaroni, R.A. Theaux, E. Hliba, and E. Juaneda. 2001. Barth's syndrome-like disorder: a new phenotype with a maternally inherited A3243G substitution of mitochondrial DNA (MELAS mutation). *American journal of medical genetics*. 99:83-93.
- DeBrosse, S., E.E. Ubogu, S. Yaniglos, M.O. Hassan, and R.J. Leigh. 2009. Dynamic properties of eye movements in mitochondrial chronic progressive external ophthalmoplegia. *Eye (London, England)*. 23:382-388.
- Deschauer, M., H. Swalwell, M. Strauss, S. Zierz, and R.W. Taylor. 2006. Novel mitochondrial transfer RNA(Phe) gene mutation associated with late-onset neuromuscular disease. *Archives of neurology*. 63:902-905.
- Dias-Tosta, E. 1988. Chronic progressive external ophthalmoplegia. II. A qualitative and quantitative electronmicroscopy study of skeletal muscles. *Arquivos de Neuro-Psiquiatria*. 46:143-155.
- Dinopoulos, A., J. Smeitink, and H. ter Laak. 2005. Unusual features of mitochondrial degeneration in skeletal muscle of patients with nuclear complex I mutation. *Acta Neuropathol*. 110:199-202.
- Enns, G.M., C.L. Hoppel, S.J. DeArmond, S. Schelley, N. Bass, K. Weisiger, D. Horoupian, and S. Packman. 2005. Relationship of primary mitochondrial respiratory chain dysfunction to fiber type abnormalities in skeletal muscle. *Clinical genetics*. 68:337-348.
- Fagiolari, G., M. Sciacco, L. Chiveri, C. Lamperti, G.P. Comi, G. Scarlato, M. Moggio, and A. Prellè. 2002. Lack of apoptosis in patients with progressive external ophthalmoplegia and mutated adenine nucleotide translocator-1 gene. *Muscle and Nerve*. 26:265-269.
- Federico, A., L. Manneschi, M. Meloni, C. Alessandrini, A.M. Bardelli, M.T. Dotti, and P. Sabatelli. 1988. Histochemical, ultrastructural and biochemical study of muscle mitochondria in Leber's hereditary optic atrophy. *Journal of Inherited Metabolic Disease*. 11:193-197.
- Fillano, J.J., M.J. Goldenthal, C.H. Rhodes, and J. Marin-Garcia. 2002. Mitochondrial dysfunction in patients with hypotonia, epilepsy, autism, and developmental delay: HEADD syndrome. *J Child Neurol*. 17:435-439.
- Fischer, J.C., W. Ruitenbeek, F.J.M. Gabreëls, A.J.M. Janssen, W.O. Renier, R.C.A. Sengers, A.M. Stadhouders, H.J. ter Laak, J.M.F. Trijbels, and J.H. Veerkamp. 1986. A mitochondrial encephalomyopathy: the first case with an established defect at the level of coenzyme Q. *European Journal of Pediatrics*. 144:441-444.
- Fitzsimons, R.B., and H.D.D. Tyer. 1980. A study of a myopathy presenting as idiopathic scoliosis. Multicore disease or mitochondrial myopathy? *Journal of the Neurological Sciences*. 46:33-48.
- Fukuhara, N., S. Tokiguchi, K. Shirakawa, and T. Tsubaki. 1980. Myoclonus epilepsy associated with ragged-red fibres (mitochondrial abnormalities): disease entity or a syndrome? Light- and electron-microscopic studies of two cases and review of literature. *Journal of the neurological sciences*. 47:117-133.
- Gilbert, R.D., and M. Emms. 1996. Pearson's syndrome presenting with Fanconi syndrome. *Ultrastructural Pathology*. 20:473-475.



- Gotz, A., P. Isohanni, B. Liljestrom, J. Rummukainen, K. Nikolajev, E. Herrgard, S. Marjavaara, and A. Suomalainen. 2012. Fatal neonatal lactic acidosis caused by a novel de novo mitochondrial G7453A tRNA-Serine ((UCN)) mutation. *Pediatr Res.* 72:90-94.
- Güçer, Ş., B. Talim, E. Aşan, P. Korkusuz, S. Özen, Ş. Ünal, S.H. Kalkanoğlu, G. Kale, and M. Çağlar. 2005. Focal segmental glomerulosclerosis associated with mitochondrial cytopathy: Report of two cases with special emphasis on podocytes. *Pediatric and Developmental Pathology.* 8:710-717.
- Haginoya, K., S. Miyabayashi, K. Inuma, and K. Tada. 1990. Mosaicism of mitochondria in mitochondrial myopathy: an electronmicroscopic analysis of cytochrome c oxidase. *Acta Neuropathologica.* 80:642-648.
- Han, Y., B. Deng, M. Liu, J. Jiang, S. Wu, and Y. Guan. 2010. Clinical and genetic study of a Chinese family with spinocerebellar ataxia type 7. *Neurology India.* 58:622-626.
- Hayes, D.J., B.R.F. Lecky, D.N. Landon, J.A. Morgan-Hughes, and J.B. Clark. 1984. A new mitochondrial myopathy. Biochemical studies revealing a deficiency in the cytochrome b-c1 complex (complex III) of the respiratory chain. *Brain : a journal of neurology.* 107:1165-1177.
- Heiman-Patterson, T.D., Z. Argov, J.M. Chavin, B. Kalman, H. Alder, S. DiMauro, W. Bank, and A.J. Tahmouh. 1997. Biochemical and genetic studies in a family with mitochondrial myopathy. *Muscle & nerve.* 20:1219-1224.
- Herrero-Marti, N.M.D., T. Ayuso, M.T. Tunon, M.A. Martin, E. Ruiz-Pesini, and J. Montoya. 2010. A MELAS/MERRF phenotype associated with the mitochondrial DNA 5521G>A mutation. *Journal of Neurology, Neurosurgery and Psychiatry.* 81:471-472.
- Higashikata, T., J. Koyama, H. Shimada, M. Yazaki, M. Owa, and S. Ikeda. 2001. An 80-year-old mitochondrial disease patient with A3243G tRNA(Leu(UUR)) gene presenting cardiac dysfunction as the main symptom. *Internal medicine (Tokyo, Japan).* 40:405-408.
- Holliday, P.L., A.R. Climie, J. Gilroy, and M.Z. Mahmud. 1983. Mitochondrial myopathy and encephalopathy: Three cases—a deficiency of NADH-CoQ dehydrogenase? *Neurology.* 33:1619-1622.
- Hopmann, D., A. Kivi, W. Stenzel, R. Ehret, and J. Mueller. 2014. Late onset myopathy and hyperkinetic movement disorder. *Clinical Neurophysiology.* 125:S209.
- Hudgson, P., W.G. Bradley, and M. Jenkinson. 1972. Familial "mitochondrial" myopathy. A myopathy associated with disordered oxidative metabolism in muscle fibres Part 1. Clinical, electrophysiological and pathological findings. *Journal of the Neurological Sciences.* 16:343-370.
- Ionasescu, V.V., M. Hart, S. DiMauro, and C.T. Moraes. 1994. Clinical and morphologic features of a myopathy associated with a point mutation in the mitochondrial tRNA(Pro) gene. *Neurology.* 44:975-977.
- Karpati, G., S. Carpenter, A.G. Engel, G. Watters, J. Allen, S. Rothman, G. Klassen, and O.A. Mamer. 1975. The syndrome of systemic carnitine deficiency. Clinical, morphologic, biochemical, and pathophysiological features. *Neurology.* 25:16-24.
- Karppa, M., R. Herva, A.R. Moslemi, A. Oldfors, S. Kakko, and K. Majamaa. 2005. Spectrum of myopathic findings in 50 patients with the 3243A>G mutation in mitochondrial DNA. *Brain : a journal of neurology.* 128:1861-1869.
- Kendall, F.D. 2012. Mitochondrial disorders: Overview of diagnostic tools and new diagnostic trends. *Journal of Pediatric Biochemistry.* 2:193-203.

- Kennaway, N.G., N.R.M. Buist, V.M. Darley–usmar, A. Papadimitriou, S. Dimauro, R.I. Kelley, R.A. Capaldi, N.K. Blank, and A. D'Agostino. 1984. Lactic acidosis and mitochondrial myopathy associated with deficiency of several components of complex III of the respiratory chain. *Pediatric Research*. 18:991-999.
- Kim, D.S., D.S. Jung, K.H. Park, I.J. Kim, C.M. Kim, W.H. Lee, and S.K. Rho. 2002. Histochemical and molecular genetic study of MELAS and MERRF in Korean patients. *J Korean Med Sci*. 17:103-112.
- Kim, G.W., S.M. Kim, I.N. Sunwoo, and J.G. Chi. 1991. Two cases of mitochondrial myopathy with predominant respiratory dysfunction. *Yonsei medical journal*. 32:184-189.
- Kim, J.S., C.J. Kim, J.G. Chi, and H.J. Myung. 1989. Chronic progressive external ophthalmoplegia (CPEO) with 'ragged red fibers'. A case report. *Journal of Korean Medical Science*. 4:91-96.
- Kim, S.H., and J.G. Chi. 1997. Characterization of a mitochondrial DNA deletion in patients with mitochondrial myopathy. *Molecules and cells*. 7:726-729.
- Korenke, G.C., H.A.C.M. Bentlage, W. Ruitenbeek, R.C.A. Sengers, W. Sperl, J.M.F. Trijbels, F.J.M. Gabreels, F.A. Wijburg, V. Wiedermann, F. Hanefeld, U. Wendel, M. Reckmann, V. Griebel, and H. Wölk. 1990. Isolated and combined deficiencies of NADH dehydrogenase (complex I) in muscle tissue of children with mitochondrial myopathies. *European Journal of Pediatrics*. 150:104-108.
- Kyriacou, K., A. Hadjisavvas, A. Zenios, R. Papacharalambous, and T. Kyriakides. 2005. Morphological methods in the diagnosis of mitochondrial encephalomyopathies: the role of electron microscopy. *Ultrastruct Pathol*. 29:169-174.
- Kyriacou, K., C. Mikellidou, A. Hadjianastasiou, L. Middleton, A. Panousopoulos, and T. Kyriakides. 1999. Ultrastructural diagnosis of mitochondrial encephalomyopathies revisited. *Ultrastructural Pathology*. 23:163-170.
- Kyriakides, T., A. Drousiotou, A. Panasopoulou, A. Hadjisavvas, A. Zenios, G.M. Hadjigeorgiou, and K. Kyriacou. 2003. A comparative morphological study in 33 cases of respiratory chain encephalomyopathies. *Acta Myologica*. 22:48-51.
- Land, J.M., J.M. Hockaday, J.T. Hughes, and B.D. Ross. 1981. Childhood mitochondrial myopathy with ophthalmoplegia. *Journal of the Neurological Sciences*. 51:371-382.
- Lang, T., N. Laver, M.B. Strominger, A. Witking, R. Pfannl, and J. Alroy. 2010. Morphological findings of extraocular myopathy with chronic progressive external ophthalmoplegia. *Ultrastruct Pathol*. 34:78-81.
- Lehmann, J., J. Ziegen, G. Oertel, J. Lößner, and H.J. Kühn. 1986. Myopathy with mitochondrial abnormalities and rimmed vacuoles. *Acta Neuropathologica*. 70:86-90.
- Letellier, T., M. Malgat, M. Coquet, B. Moretto, F. Parrot-Roulaud, and J.P. Mazat. 1992. Mitochondrial myopathy studies on permeabilized muscle fibers. *Pediatr Res*. 32:17-22.
- Linda, S., I. Lund, T. Torbergsen, J. Aasly, S.I. Mellgren, O. Borud, and P. Monstad. 1992. Mitochondrial diseases and myopathies: A series of muscle biopsy specimens with ultrastructural changes in the mitochondria. *Ultrastructural Pathology*. 16:263-275.

- Linden, G.J.v.d., and B.J.J. Ansink. 1979. A case of the Kearns - Shy syndrome. *Clinical Neurology and Neurosurgery*. 81:45-52.
- Lopez, C.P., P.G. Rios, E.R. Infante, P. Carbonell, M. Hirano, and S. DiMauro. 2013. TK2 mutation presenting as indolent myopathy. *Neurology Conference: 65th American Academy of Neurology Annual Meeting San Diego, CA United States. Conference Start*. 80.
- Lu, J., and Y. Huang. 2013. Childhood mitochondrial encephalomyopathies: clinical course, diagnosis, neuroimaging findings, mtDNA mutations and outcome in six children. *Italian journal of pediatrics*. 39:60.
- Makino, M., S. Horai, Y.I. Goto, and I. Nonaka. 2000. Mitochondrial DNA mutations in Leigh syndrome and their phylogenetic implications. *Journal of Human Genetics*. 45:69-75.
- Marín-García, J., M.J. Goldenthal, L. Flores-Sarnat, and H.B. Sarnat. 2002. Severe mitochondrial cytopathy with complete A-V block, PEO, and mtDNA deletions. *Pediatric neurology*. 27:213-216.
- McKelvie, P.A., J.B. Morley, E. Byrne, and S. Marzuki. 1991. Mitochondrial encephalomyopathies: A correlation between neuropathological findings and defects in mitochondrial DNA. *Journal of the Neurological Sciences*. 102:51-60.
- McLeod, J.G., D.C. Baker, C.D. Shorey, and C.B. Kerr. 1975. Mitochondrial myopathy with multisystem abnormalities and normal ocular movements. *Journal of the Neurological Sciences*. 24:39-52.
- Melberg, A., P.O. Lundberg, K.G. Henriksson, Y. Olsson, and E. Stålberg. 1996. Muscle-nerve involvement in autosomal dominant progressive external ophthalmoplegia with hypogonadism. *Muscle and Nerve*. 19:751-757.
- Melegh, B., L. Seress, T. Bedekovics, G. Kispál, B. Sümegi, K. Trombitás, and K. Méhes. 1999. Muscle carnitine acetyltransferase and carnitine deficiency in a case of mitochondrial encephalomyopathy. *Journal of Inherited Metabolic Disease*. 22:827-838.
- Mierau, G.W., R.W. Tyson, and C.L. Freehauf. 2004. Role of electron microscopy in the diagnosis of mitochondrial cytopathies. *Pediatric and developmental pathology : the official journal of the Society for Pediatric Pathology and the Paediatric Pathology Society*. 7:637-640.
- Miles, L., B.L. Wong, A. Dinopoulos, P.J. Morehart, I.A. Hofmann, and K.E. Bove. 2006. Investigation of children for mitochondriopathy confirms need for strict patient selection, improved morphological criteria, and better laboratory methods. *Human pathology*. 37:173-184.
- Mitsumoto, H., J.R. Aprille, S.H. Wray, R. Nemni, and W.G. Bradley. 1983. Chronic progressive external ophthalmoplegia (CEPO): Clinical, morphologic, and biochemical studies. *Neurology*. 33:452-461.
- Mizusawa, H., M. Watanabe, I. Kanazawa, T. Nakanishi, M. Kobayashi, M. Tanaka, H. Suzuki, M. Nishikimi, and T. Ozawa. 1988. Familial mitochondrial myopathy associated with peripheral neuropathy: Partial deficiencies of complex I and complex IV. *Journal of the Neurological Sciences*. 86:171-184.
- Modi, G., J.M. Heckman, and D. Saffer. 1992. Vitelliform macular degeneration associated with mitochondrial myopathy. *The British journal of ophthalmology*. 76:58-60.
- Müller-Höcker, J., I. Paetzke, D. Pongratz, and G. Hübner. 1985. Mitochondrial myopathy with diffuse activation and focal deficiency of mitochondrial ATPase and carnitine deficiency. *Virchows Archiv B Cell Pathology Including Molecular Pathology*. 48:185-196.

- Müller-Höcker, J., D. Pongratz, and G. Hübner. 1983. Focal deficiency of cytochrome-c-oxidase in skeletal muscle of patients with progressive external ophthalmoplegia - Cytochemical-fine-structural study. *Virchows Archiv A Pathological Anatomy and Histopathology*. 402:61-71.
- Nevo, Y., D. Soffer, M. Kutai, N. Zelnik, A. Saada, J. Jossiphov, G. Messer, A. Shaag, E. Shahar, S. Harel, and O. Elpeleg. 2002. Clinical characteristics and muscle pathology in myopathic mitochondrial DNA depletion. *J Child Neurol*. 17:499-504.
- Niebrój-Doblosz, I., B. Ryniewicz, A. Fidziańska, and B. Badurska. 1985. Lipid storage myopathy in Kearns-Sayre syndrome. *Neurology*. 35:1582-1586.
- Nolte, K.W., S. Trepels-Kottek, D. Honnef, J. Weis, C.G. Bien, A. van Baalen, K. Ritter, B. Czermin, S. Rudnik-Schoneborn, N. Wagner, and M. Hausler. 2013. Early muscle and brain ultrastructural changes in polymerase gamma 1-related encephalomyopathy. *Neuropathology : official journal of the Japanese Society of Neuropathology*. 33:59-67.
- Norby, S., P. Lestienne, I. Nelson, I.M. Nielsen, H. Schmalbruch, O. Sjo, and M. Warburg. 1994. Juvenile Kearns-Sayre syndrome initially misdiagnosed as a psychosomatic disorder. *Journal of medical genetics*. 31:45-50.
- Nozuma, S., Y. Okamoto, I. Higuchi, J. Yuan, A. Hashiguchi, Y. Sakiyama, A. Yoshimura, Y. Higuchi, and H. Takashima. 2015. Clinical and electron microscopic findings in two patients with mitochondrial myopathy associated with episodic hyper-creatine kinase-emia. *Internal Medicine*. 54:3209-3214.
- Patterson, K. 2004. Mitochondrial muscle pathology. *Pediatric and developmental pathology : the official journal of the Society for Pediatric Pathology and the Paediatric Pathology Society*. 7:629-632.
- Paulus, W., A. Stevens, and W. Roggendorf. 1989. Mitochondrial encephalomyopathy with pilovacuolar inclusion or phenocopy with mitochondrial artefact? *Journal of Neurology*. 236:361-363.
- Perry, M.S., and J.T. Sladky. 2008. Neuroradiologic findings in Sengers syndrome. *Pediatric neurology*. 39:113-115.
- Pfeffer, G., P.J. Waters, J. Maguire, H.D. Vallance, V.A. Wong, and M.M. Mezei. 2012. Levator palpebrae biopsy and diagnosis of progressive external ophthalmoplegia. *The Canadian journal of neurological sciences. Le journal canadien des sciences neurologiques*. 39:520-524.
- Polimeno, L., R. Rossi, M. Mastrodonato, M. Montagnani, D. Piscitelli, B. Pesetti, L. De Benedictis, B. Girardi, L. Resta, A. Napoli, and A. Francavilla. 2013. Augmenter of liver regeneration, a protective factor against ROS-induced oxidative damage in muscle tissue of mitochondrial myopathy affected patients. *The international journal of biochemistry & cell biology*. 45:2410-2419.
- Prick, M.J.J., F.J. M. Gabreëls, J.M.F. Trijbels, A.J.M. Janssen, R. le Coulter, K. van Dam, H.H. J. Jaspar, E. J. Ebels, and A.A.W.O. de Coul. 1983. Progressive poliodystrophy (alpers') disease) with a defect in cytochromeaa3 in muscle: a report of two unrelated patients. *Clinical Neurology and Neurosurgery*. 85:57-70.
- Pronicki, M., E. Matyja, D. Piekutowska-Abramczuk, T. Szymanska-Debinska, A. Karkucinska-Wieckowska, E. Karczmarewicz, W. Grajkowska, T. Kmiec, E. Popowska, and J. Sykut-Cegielska. 2008. Light and electron microscopy characteristics of the muscle of patients with SURF1 gene mutations associated with Leigh disease. *Journal of clinical pathology*. 61:460-466.

- Pulkes, T., D. Liolitsa, L.H. Eunson, M. Rose, I.P. Nelson, S. Rahman, J. Poulton, D.R. Marchington, D.N. Landon, A.G. Debono, J.A. Morgan-Hughes, and M.G. Hanna. 2005. New phenotypic diversity associated with the mitochondrial tRNA(SerUCN) gene mutation. *Neuromuscular disorders : NMD*. 15:364-371.
- Reichmann, H., R. Gold, B. Meurers, M. Naumann, P. Seibel, U. Walter, and T. Klopstock. 1993. Progression of myopathology in Kearns-Sayre syndrome: a morphological follow-up study. *Acta Neuropathologica*. 85:679-681.
- Rivner, M.H., M. Shamsnia, T.R. Swift, J. Trefz, R.A. Roesel, A.L. Carter, W. Yanamura, and F.A. Hommes. 1989. Kearns-Sayre syndrome and complex II deficiency. *Neurology*. 39:693-696.
- Roefs, A.M., P.J. Waters, G.R.W. Moore, and P.J. Dolman. 2012. Orbicularis oculi muscle biopsies for mitochondrial DNA analysis in suspected mitochondrial myopathy. *British Journal of Ophthalmology*. 96:1296-1299.
- Rollins, S., R.A. Prayson, J.T. McMahon, and B.H. Cohen. 2001. Diagnostic yield of muscle biopsy in patients with clinical evidence of mitochondrial cytopathy. *American Journal of Clinical Pathology*. 116:326-330.
- Saneto, R.P., and A. Bouldin. 2006. A boy with muscle weakness, hypercarbia, and the mitochondrial DNA A3243G mutation. *Journal of Child Neurology*. 21:77-79.
- Sarnat, H.B., G. Machin, H.Z. Darwish, and S.Z. Rubin. 1983. Mitochondrial myopathy of cerebro-hepato-renal (Zellweger) syndrome. *Canadian Journal of Neurological Sciences*. 10:170-177.
- Schaaf, C.P., M. Blazo, R.A. Lewis, R.E. Tonini, H. Takei, J. Wang, L.J. Wong, and F. Scaglia. 2011. Early-onset severe neuromuscular phenotype associated with compound heterozygosity for OPA1 mutations. *Molecular genetics and metabolism*. 103:383-387.
- Schapira, A.H.V., J.M. Cooper, J.A. Morgan-Hughes, D.N. Landon, and J.B. Clark. 1990. Mitochondrial myopathy with a defect of mitochondrial-protein transport. *New England Journal of Medicine*. 323:37-42.
- Sengers, R.C.A., J.C. Fischer, J.M.F. Trijbels, W. Ruitenbeek, A.M. Stadhouders, H.J. ter Laak, and H.H.J. Jaspard. 1983. A mitochondrial myopathy with a defective respiratory chain and carnitine deficiency. *European Journal of Pediatrics*. 140:332-337.
- Shah, A.J., V. Sahgal, G. Muschler, V. Subramani, and H. Singh. 1982. Morphogenesis of the mitochondrial alterations in muscle diseases. *J Neurol Sci*. 55:25-37.
- Shibasaki, H., T. Santa, and Y. Kuroiwa. 1973. Late onset mitochondrial myopathy. *Journal of the Neurological Sciences*. 18:301-310.
- Siriwardena, K., N. Mackay, V. Levandovskiy, S. Blaser, J. Raiman, P.F. Kantor, C. Ackerley, B.H. Robinson, A. Schulze, and J.M. Cameron. 2013. Mitochondrial citrate synthase crystals: novel finding in Sengers syndrome caused by acylglycerol kinase (AGK) mutations. *Molecular genetics and metabolism*. 108:40-50.
- Smith, M.L., X.Y. Hua, D.L. Marsden, D. Liu, N.G. Kennaway, K.Y. Ngo, and R.H. Haas. 1997. Diabetes and mitochondrial encephalomyopathy with lactic acidosis and stroke-like episodes (MELAS): radiolabeled polymerase chain reaction is necessary for accurate detection of low percentages of mutation. *The Journal of clinical endocrinology and metabolism*. 82:2826-2831.

- Stadhouders, A.M., P.H.K. Jap, H.P. Winkler, H.M. Eppenberger, and T. Wallimann. 1994. Mitochondrial creatine kinase: A major constituent of pathological inclusions seen in mitochondrial myopathies. *Proceedings of the National Academy of Sciences of the United States of America*. 91:5089-5093.
- Stadhouders, A.M., and R.C.A. Sengers. 1987. Morphological observations in skeletal muscle from patients with a mitochondrial myopathy. *Journal of Inherited Metabolic Disease*. 10:62-80.
- Stenqvist, L., A. Paetau, L. Valanne, A. Suomalainen, and H. Pihko. 2005. A juvenile case of MELAS with T3271C mitochondrial DNA mutation. *Pediatr Res*. 58:258-262.
- Sumegi, B., B. Melegh, K. Adamovich, and K. Trombitas. 1990. Cytochrome oxidase deficiency affecting the structure of the myofibre and the shape of mitochondrial cristae membrane. *Clinica Chimica Acta*. 192:9-18.
- Suzuki, T., J. Koizumi, H. Shiraishi, K. Ofuku, M. Sasaki, T. Hori, and N. Oskoshi. 1989. Psychiatric disturbance in mitochondrial encephalomyopathy. *Journal of neurology, neurosurgery, and psychiatry*. 52:920-922.
- Takahashi, S., Y. Makita, J. Oki, A. Miyamoto, J. Yanagawa, E. Naito, Y. Goto, and A. Okuno. 1998. De novo mtDNA nt 8993 (T-->G) mutation resulting in Leigh syndrome. *American journal of human genetics*. 62:717-719.
- Takeda, S., E. Ohama, and F. Ikuta. 1990. Involvement of extraocular muscle in mitochondrial encephalomyopathy. *Acta Neuropathologica*. 80:118-122.
- Telerman-Toppet, N., D. Biarent, J.M. Bouton, L. de Meirleir, C. Elmer, S. Noel, E. Vamos, and S. DiMauro. 1992. Fatal cytochrome c oxidase-deficient myopathy of infancy associated with mtDNA depletion. Differential involvement of skeletal muscle and cultured fibroblasts. *Journal of Inherited Metabolic Disease*. 15:323-326.
- Thajeb, P., Y.S. Ma, C.Y. Tzen, C.K. Chuang, T.Y. Wu, S.C. Chen, and Y.H. Wei. 2006. Oculopharyngeal somatic myopathy in a patient with a novel large-scale 3,399 bp deletion and a homoplasmic T5814C transition of the mitochondrial DNA. *Clin Neurol Neurosurg*. 108:407-410.
- Toscano, A., M. Santoro, G. Vita, P. Girlanda, S. Sinicropi, M.C. Fazio, A. Mazzeo, C. Rodolico, M. Aguenouz, S. Bartolone, L. Bet, G.P. Comi, and C. Messina. 1996. Late-onset mitochondrial neuromyopathy: An age-related phenomenon? *Archives of Gerontology and Geriatrics*. 22:577-583.
- Uusimaa, J., S. Finnila, L. Vainionpaa, M. Karppa, R. Herva, H. Rantala, I.E. Hassinen, and K. Majamaa. 2003. A mutation in mitochondrial DNA-encoded cytochrome c oxidase II gene in a child with Alpers-Huttenlocher-like disease. *Pediatrics*. 111:e262-268.
- van Domburg, P.H., A.A. Gabreels-Festen, F.J. Gabreels, R. de Coo, W. Ruitenbeek, P. Wesseling, and H. ter Laak. 1996. Mitochondrial cytopathy presenting as hereditary sensory neuropathy with progressive external ophthalmoplegia, ataxia and fatal myoclonic epileptic status. *Brain : a journal of neurology*. 119 ( Pt 3):997-1010.
- van Ekeren, G.J., A.M. Stadhouders, G.J.M. Egberink, R.C.A. Sengers, O. Daniëls, and K. Kubat. 1987. Hereditary mitochondrial hypertrophic cardiomyopathy with mitochondrial myopathy of skeletal muscle, congenital cataract and lactic acidosis. *Virchows Archiv A Pathological Anatomy and Histopathology*. 412:47-52.

- van Wijngaarden, G.K., J. Bethlem, A.E. Meijer, W.C. Hulsmann, and C.A. Feltkamp. 1967. Skeletal muscle disease with abnormal mitochondria. *Brain : a journal of neurology*. 90:577-592.
- Vogel, H. 2001. Mitochondrial myopathies and the role of the pathologist in the molecular era. *Journal of neuropathology and experimental neurology*. 60:217-227.
- Wabbels, B., J.A. Schroeder, B. Voll, H. Siegmund, and B. Lorenz. 2007. Electron microscopic findings in levator muscle biopsies of patients with isolated congenital or acquired ptosis. *Graefe's archive for clinical and experimental ophthalmology = Albrecht von Graefes Archiv fur klinische und experimentelle Ophthalmologie*. 245:1533-1541.
- Wada, H., M. Woo, H. Nishio, S. Nagaki, H. Yanagawa, A. Imamura, S. Yokoyama, C. Ohbayashi, M. Matsuo, H. Itoh, and H. Nakamura. 1996. Vascular involvement in benign infantile mitochondrial myopathy caused by reversible cytochrome c oxidase deficiency. *Brain & development*. 18:263-268.
- Wang, L.C., W.T. Lee, W.Y. Tsai, Y.K. Tsau, and Y.Z. Shen. 2000. Mitochondrial cytopathy combined with Fanconi's syndrome. *Pediatric neurology*. 22:403-406.
- Yau, E.K.C., K.Y. Chan, K.M. Au, T.C. Chow, and Y.W. Chan. 2009. A novel mitochondrial DNA deletion in a Chinese girl with Kearns-Sayre syndrome. *Hong Kong Medical Journal*. 15:374-377.
- Yerdelen, D., F. Koc, and Z. Koc. 2008. Delayed diagnosis of Kearns-Sayre syndrome in a 38-year-old male patient: a case report. *The International journal of neuroscience*. 118:267-275.
- Yuan, J.H., Y. Sakiyama, I. Higuchi, Y. Inamori, Y. Higuchi, A. Hashiguchi, K. Higashi, A. Yoshimura, and H. Takashima. 2013. Mitochondrial myopathy with autophagic vacuoles in patients with the m.8344A>G mutation. *Journal of clinical pathology*. 66:659-664.
- Zeharia, A., N. Fischel-Ghodsian, K. Casas, Y. Bykhovskaya, H. Tamari, D. Lev, M. Mimouni, and T. Lerman-Sagie. 2005. Mitochondrial myopathy, sideroblastic anemia, and lactic acidosis: An autosomal recessive syndrome in persian jews caused by a mutation in the PUS1 gene. *Journal of Child Neurology*. 20:449-452.
- Zhao, D., Z. Wang, D. Hong, W. Zhang, and Y. Yuan. 2013. Chronic progressive external ophthalmoplegia coexistent with motor neuron disease in a patient with a novel large-scale mitochondrial DNA deletion. *Clinical Neurology and Neurosurgery*. 115:1490-1492.
